# Supplementary material for: Transcriptome Analysis Reveals Differential Gene Expression between the Closing Ductus Arteriosus and the Patent Ductus Arteriosus in Humans
Source: MDPI journal article supplement (doi:10.3390/jcdd8040045), 2021-04-16
Supplement: s1 [file s1]

**Table S1.** Gene Ontology biological process terms (size > 300) that were significantly upregulated (FDR < 0.25) in the outer part of a longer-term PGE<sub>1</sub>-treated human ductus arteriosus (DA) tissue (Case 4) compared to the tunica media of shorter-term PGE<sub>1</sub>-treated DA tissues (Cases 2 and 3).

| Gene Set Name                                | Size | NES  | FDR<br><i>q</i> -Value | Rank<br>at<br>MAX |
|----------------------------------------------|------|------|------------------------|-------------------|
| GO_ORGANELLE_FISSION                         | 431  | 1.46 | 0.071                  | 7016              |
| GO_NEGATIVE_REGULATION_OF_CELL_CYCLE_PROCESS | 315  | 1.38 | 0.181                  | 7124              |
| GO_MICROTUBULE_BASED_MOVEMENT                | 314  | 1.38 | 0.132                  | 7727              |
| GO_MICROTUBULE_CYTOSKELETON_ORGANIZATION     | 516  | 1.37 | 0.115                  | 5962              |
| GO_MICROTUBULE_BASED_PROCESS                 | 740  | 1.34 | 0.149                  | 5962              |
| GO_REGULATION_OF_CELL_CYCLE_PHASE_TRANSITION | 421  | 1.30 | 0.249                  | 6256              |
| GO_REGULATION_OF_CELL_CYCLE_PROCESS          | 705  | 1.29 | 0.234                  | 6958              |
| GO_CELL_CYCLE_PHASE_TRANSITION               | 578  | 1.29 | 0.212                  | 5961              |
| GO_CELL_DIVISION                             | 546  | 1.27 | 0.239                  | 5612              |

Abbreviations: NES, normalized enrichment score; FDR, false discovery rate

**Table S2.** Twenty genes that overlapped and were enriched (> 8-fold) in the outer part of a longer-term PGE<sub>1</sub>-treated DA tissue (Case 4) compared to the IT of shorter-term PGE<sub>1</sub>-treated DA tissues (Cases 2 and 3).

| Gene<br>Name     | Description                                           | Fold Change       |                   |
|------------------|-------------------------------------------------------|-------------------|-------------------|
|                  |                                                       | Case 1 vs. Case 2 | Case 1 vs. Case 3 |
| <i>CLEC3A</i>    | C-type lectin domain family 3 member A                | 19.5              | 187.6             |
| <i>ATP6V1G3</i>  | ATPase H <sup>+</sup> transporting V1 subunit G3      | 67.6              | 62.6              |
| <i>SAA4</i>      | serum amyloid A4, constitutive                        | 56.5              | 59.0              |
| <i>BEX1</i>      | brain expressed X-linked 1                            | 74.4              | 10.3              |
| <i>PCP4</i>      | Purkinje cell protein 4                               | 71.7              | 10.2              |
| <i>SPATA17</i>   | spermatogenesis associated 17                         | 35.4              | 32.2              |
| <i>RGS13</i>     | regulator of G-protein signaling 13                   | 32.7              | 30.1              |
| <i>ZNF837</i>    | zinc finger protein 837                               | 10.4              | 29.2              |
| <i>RNF17</i>     | ring finger protein 17                                | 26.9              | 8.4               |
| <i>KIAA1024L</i> | PREDICTED: <i>KIAA1024</i> -like                      | 17.5              | 17.3              |
| <i>LCMT2</i>     | leucine carboxyl methyltransferase 2                  | 15.8              | 17.7              |
| <i>ATP8A2</i>    | ATPase phospholipid transporting 8A2                  | 14.9              | 13.7              |
| <i>EPPIN</i>     | epididymal peptidase inhibitor                        | 14.1              | 13.1              |
| <i>ARRB1</i>     | arrestin beta 1                                       | 18.0              | 8.9               |
| <i>CHRD2</i>     | chordin-like 2                                        | 17.7              | 8.8               |
| <i>CIAPIN1</i>   | cytokine induced apoptosis inhibitor 1                | 10.4              | 14.0              |
| <i>VTCN1</i>     | V-set domain containing T cell activation inhibitor 1 | 12.6              | 8.6               |
| <i>FEM1A</i>     | fem-1 homolog A                                       | 10.3              | 10.8              |
| <i>DSCC1</i>     | DNA replication and sister chromatid cohesion 1       | 8.8               | 9.7               |
| <i>VIT</i>       | vitron                                                | 9.5               | 8.4               |

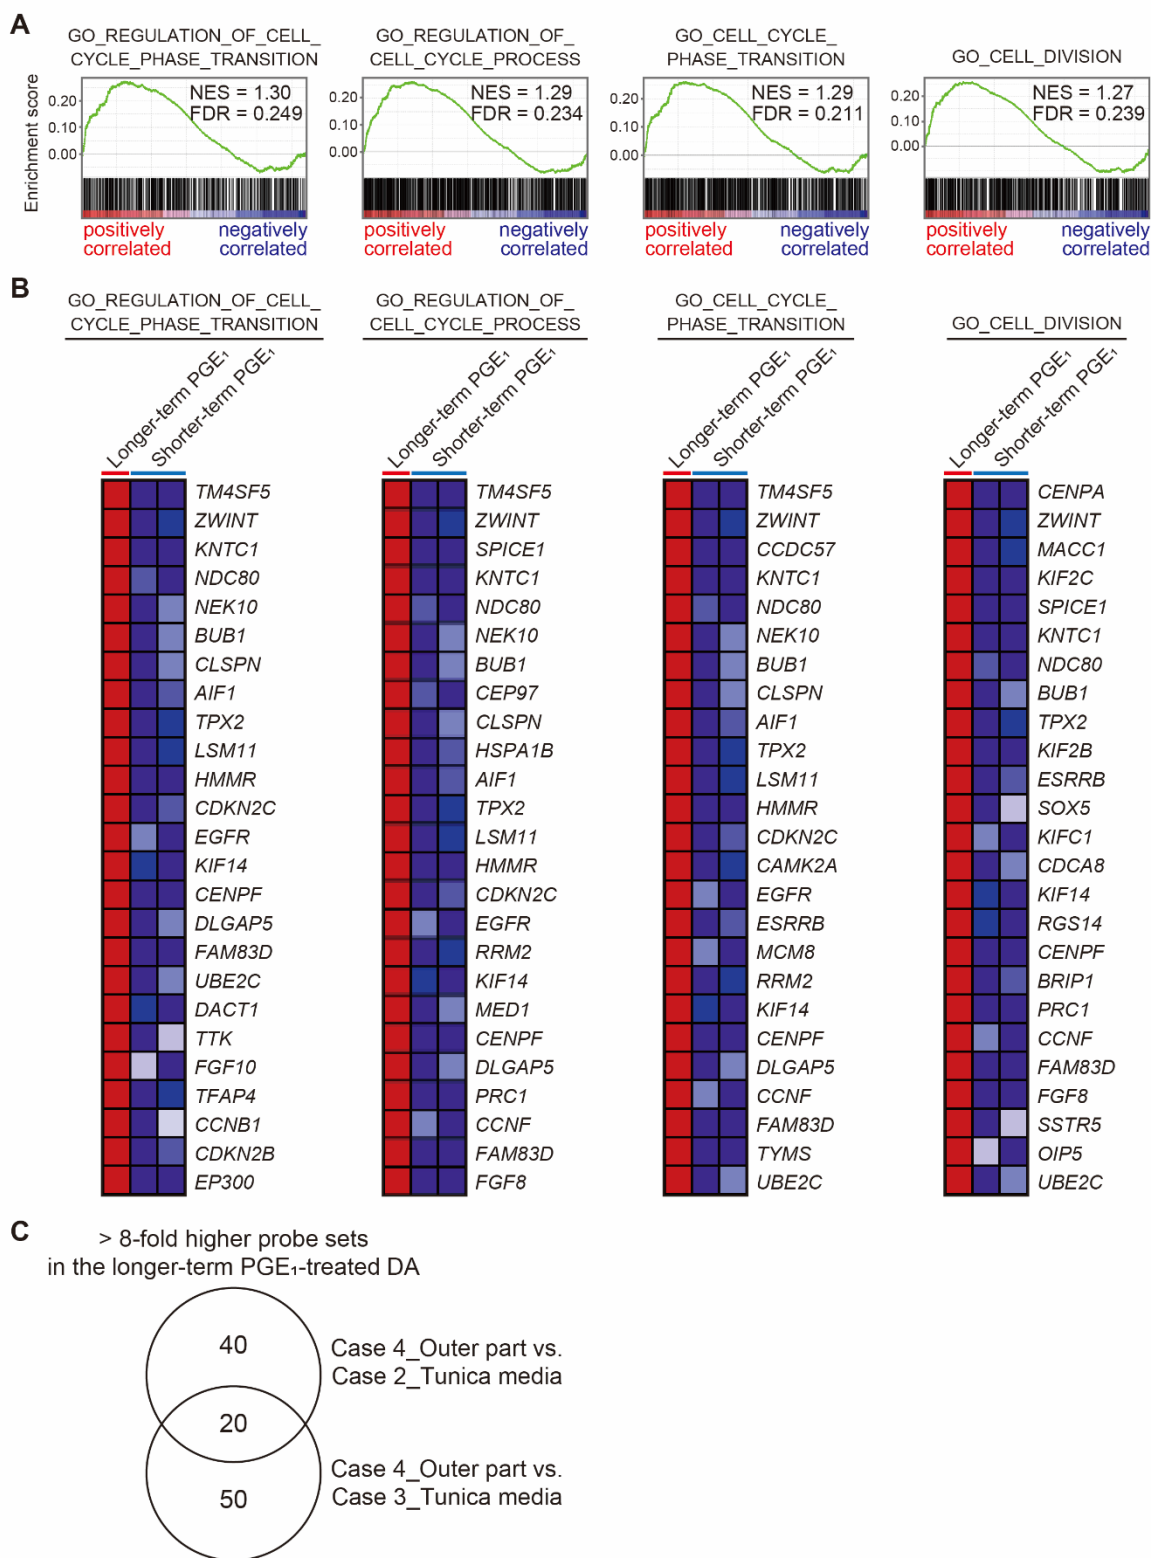

**Figure S1.** Differential gene expression between the longer-term PGE<sub>1</sub>-treated human ductus arteriosus (DA)

tissue (Case 4) and the shorter-term PGE<sub>1</sub>-treated DA tissues (Cases 2 and 3). **(A)** Gene-set enrichment analyses (GSEAs) revealed positive correlations between the outer part of the long-term PGE<sub>1</sub>-treated DA tissue and cell-cycle related genes. **(B)** The top 25 genes that comprise the leading edge of the enrichment score in **(A)** are shown as a heatmap. **(C)** A Venn diagram shows the numbers of probe sets that were highly expressed (> 8-fold) in the outer part of longer-term PGE<sub>1</sub>-treated DA tissue (Case 4) compared to the tunica media of shorter-term PGE<sub>1</sub>-treated DA tissues (Cases 2 and 3). NES, normalized enrichment score; FDR, false discovery rate. .
